# Supplementary material for: In situ experimental evidences for responses of abyssal benthic biota to shifts in phytodetritus compositions linked to global climate change
Source: PubMed Central journal article supplement (PMC9293103; doi:10.1111/gcb.15882), 2021-09-23

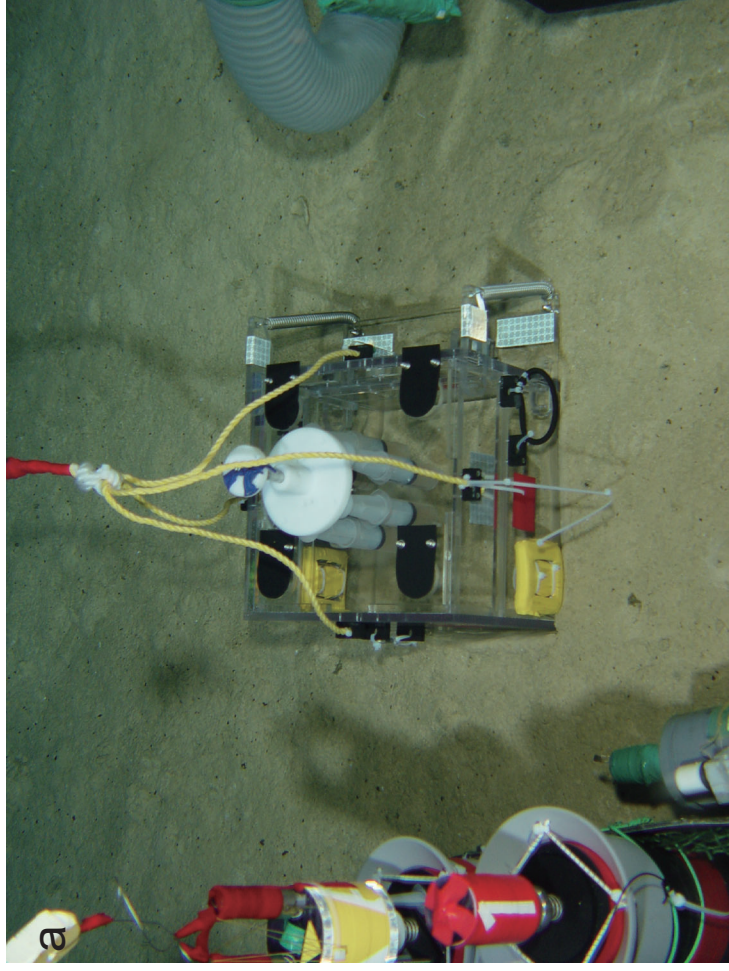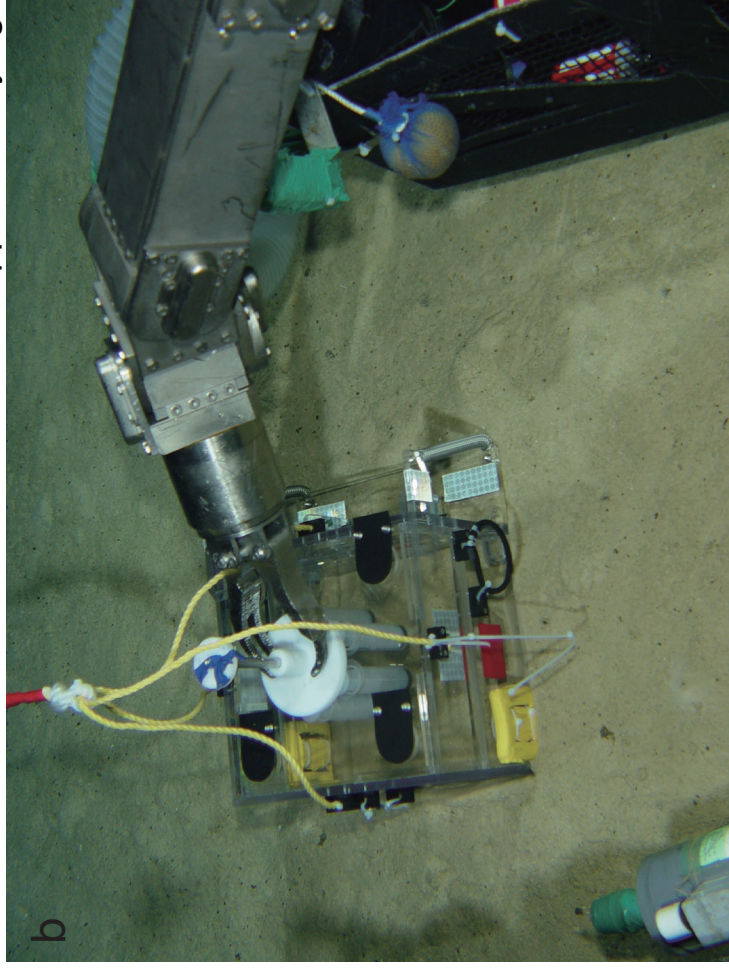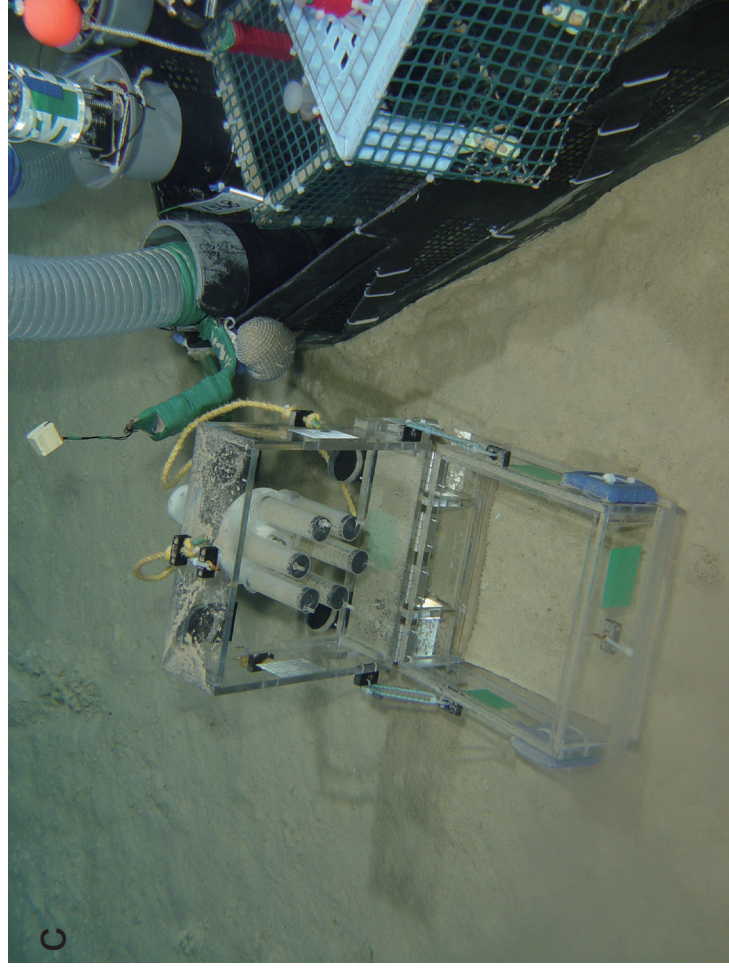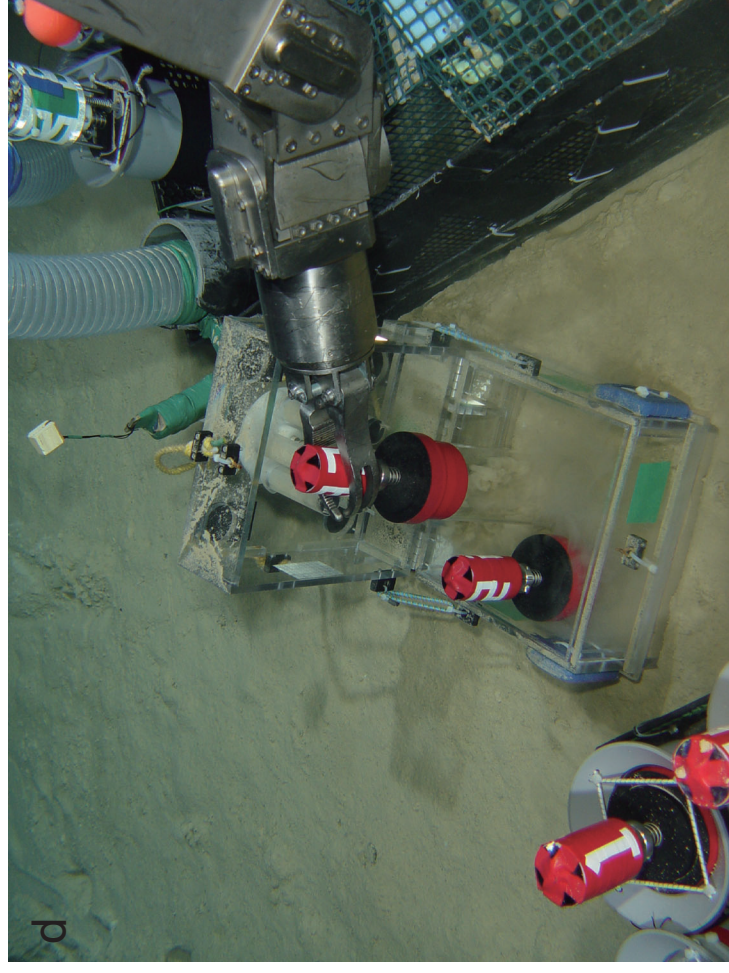



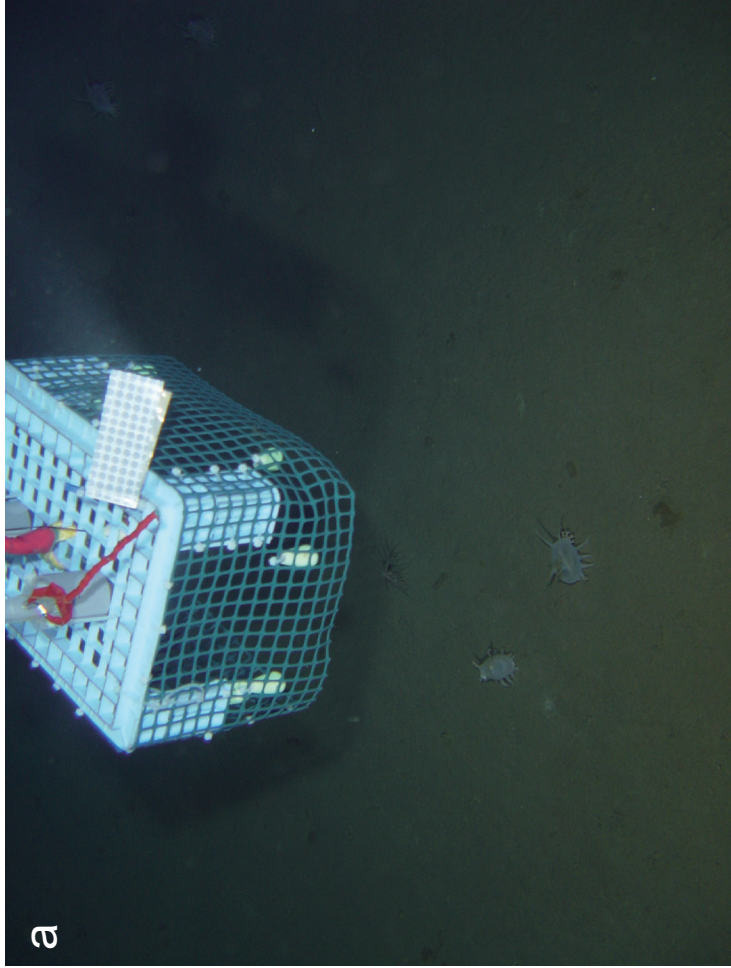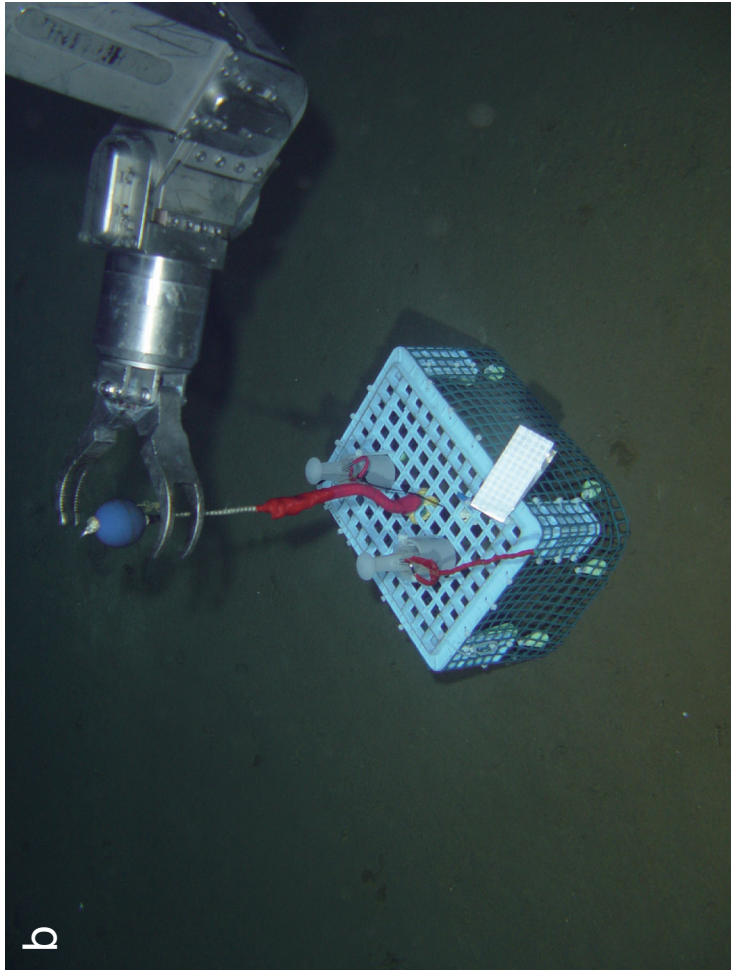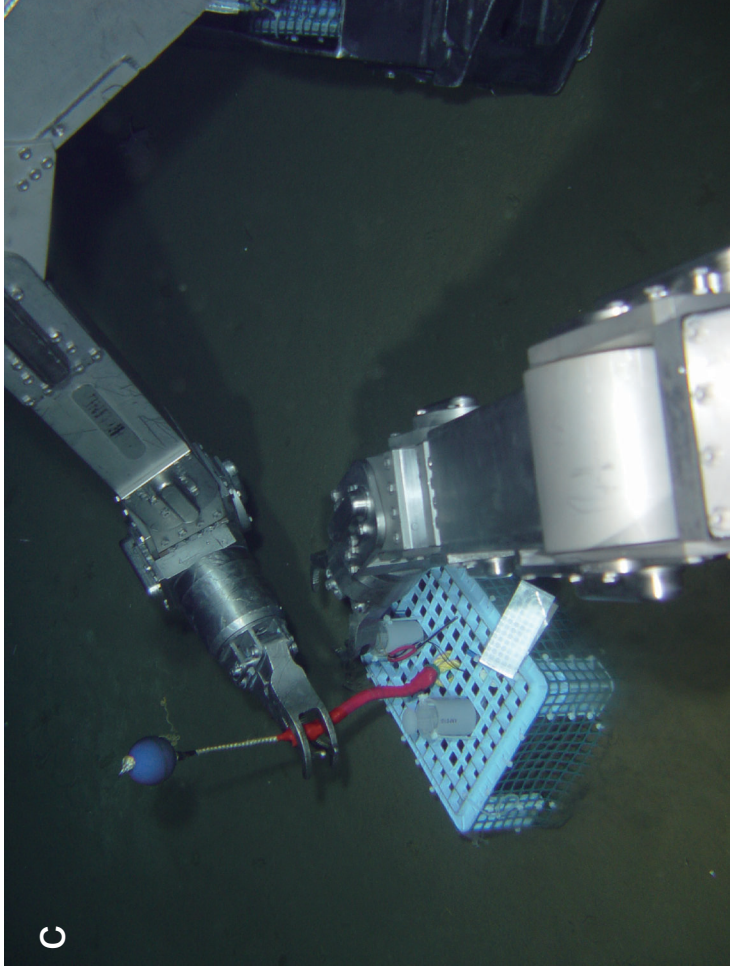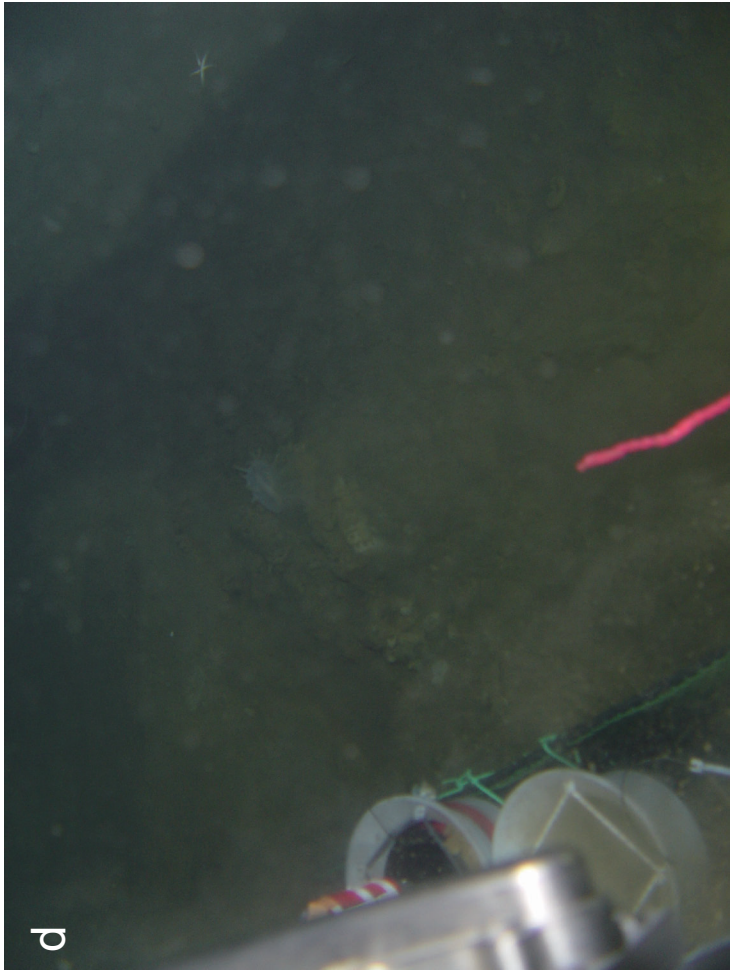

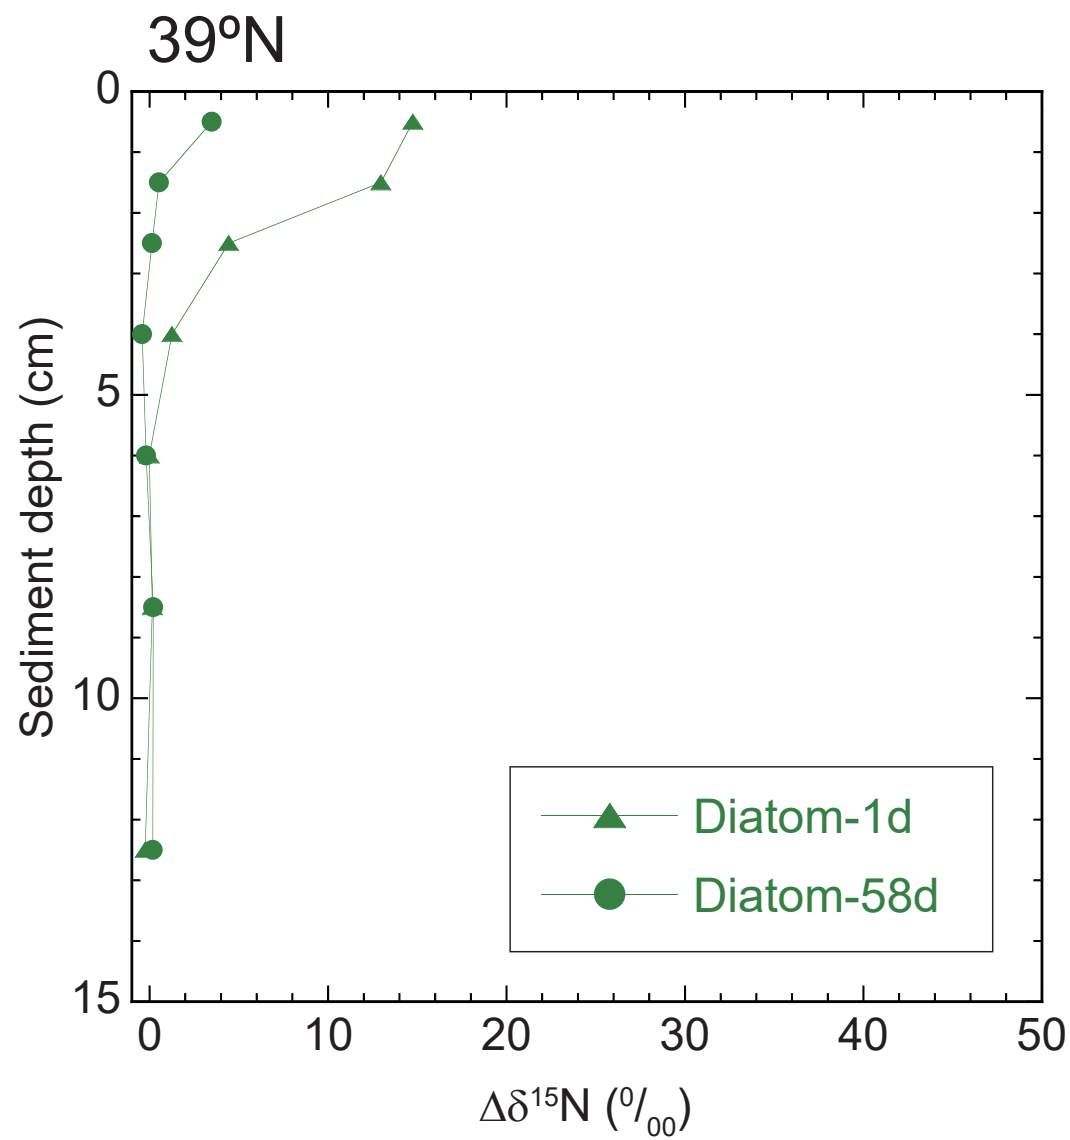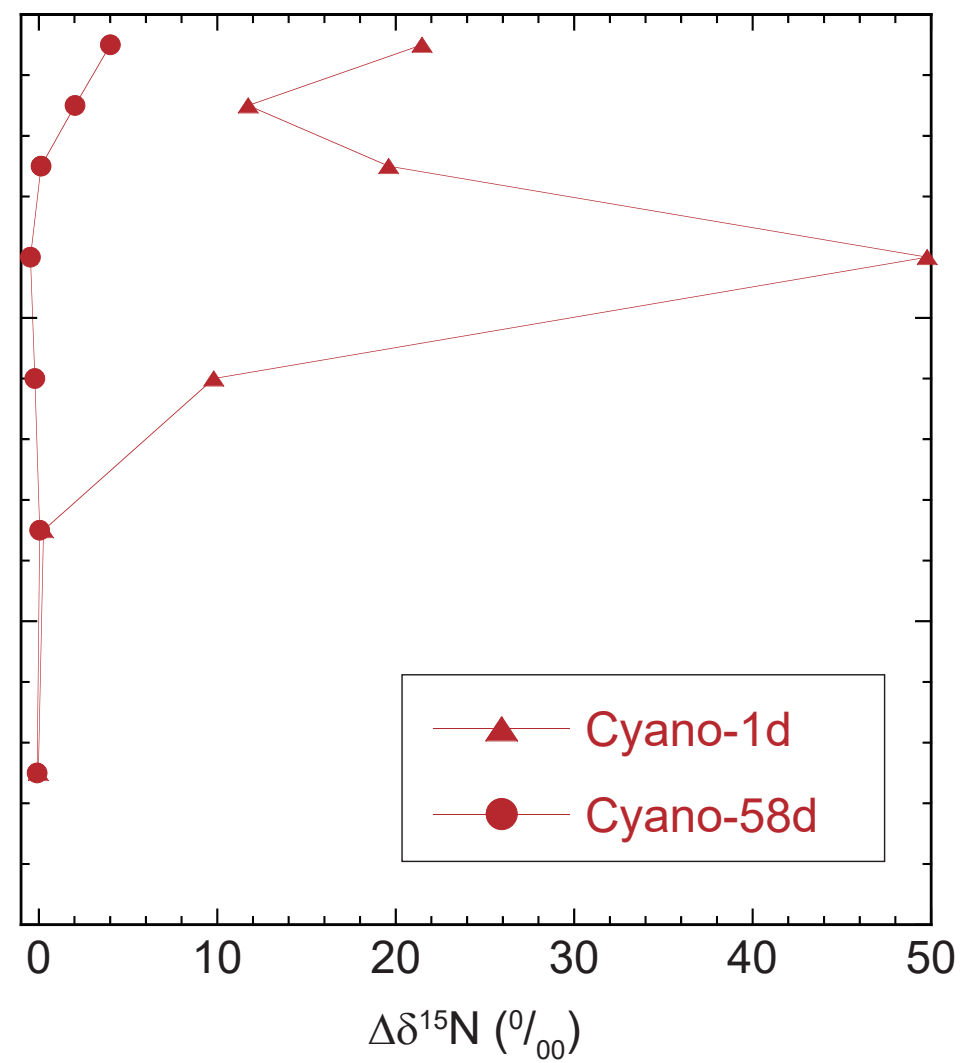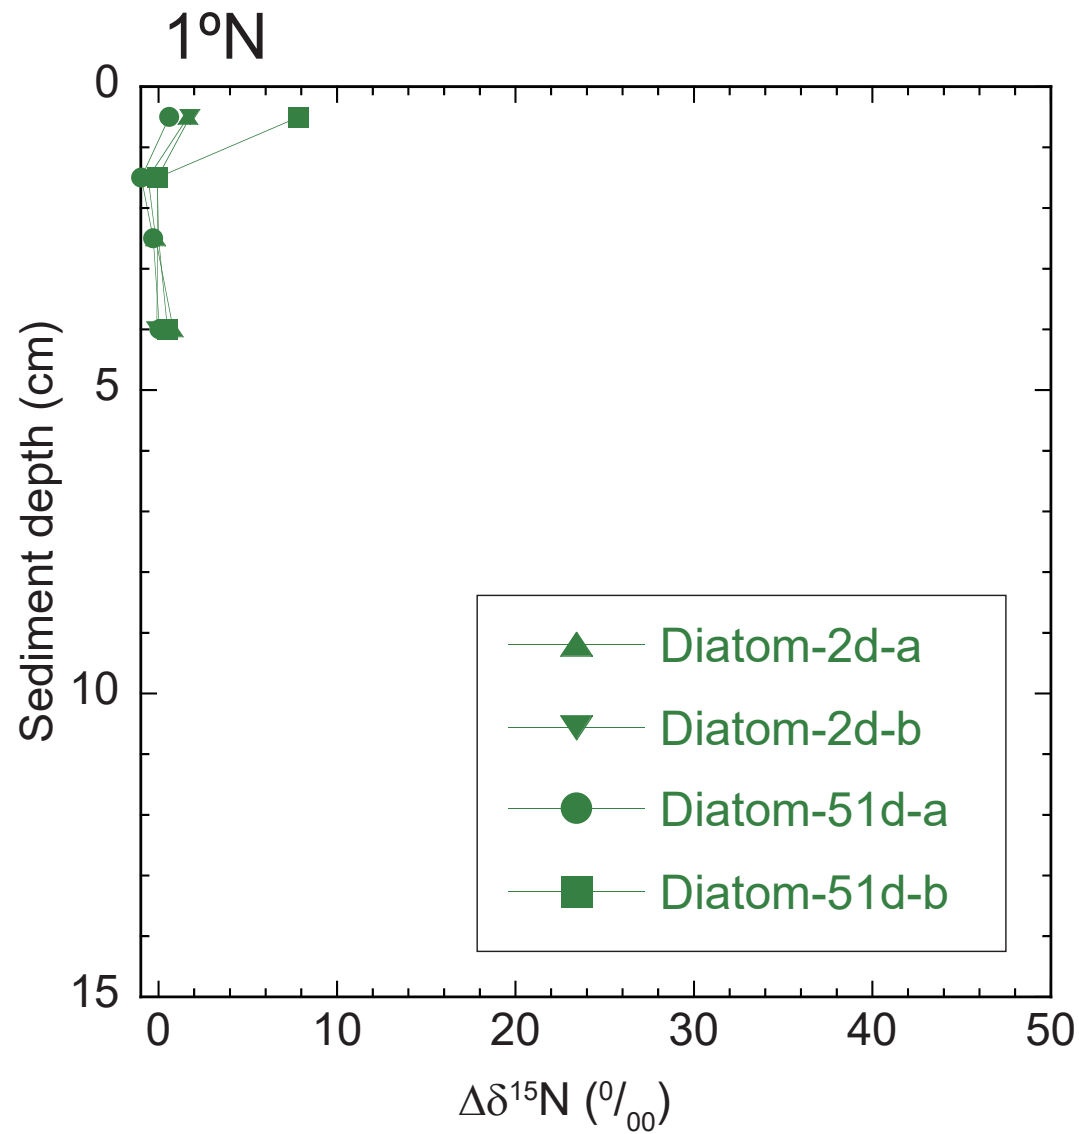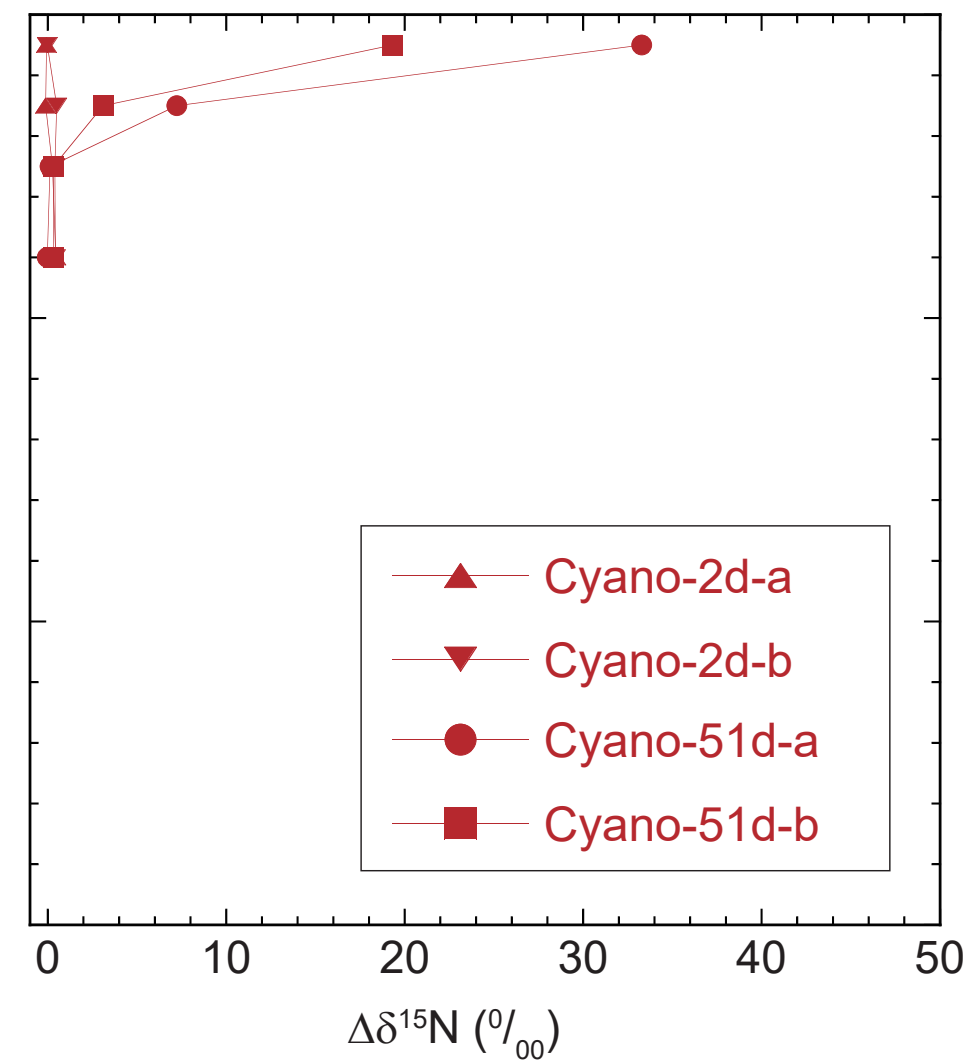

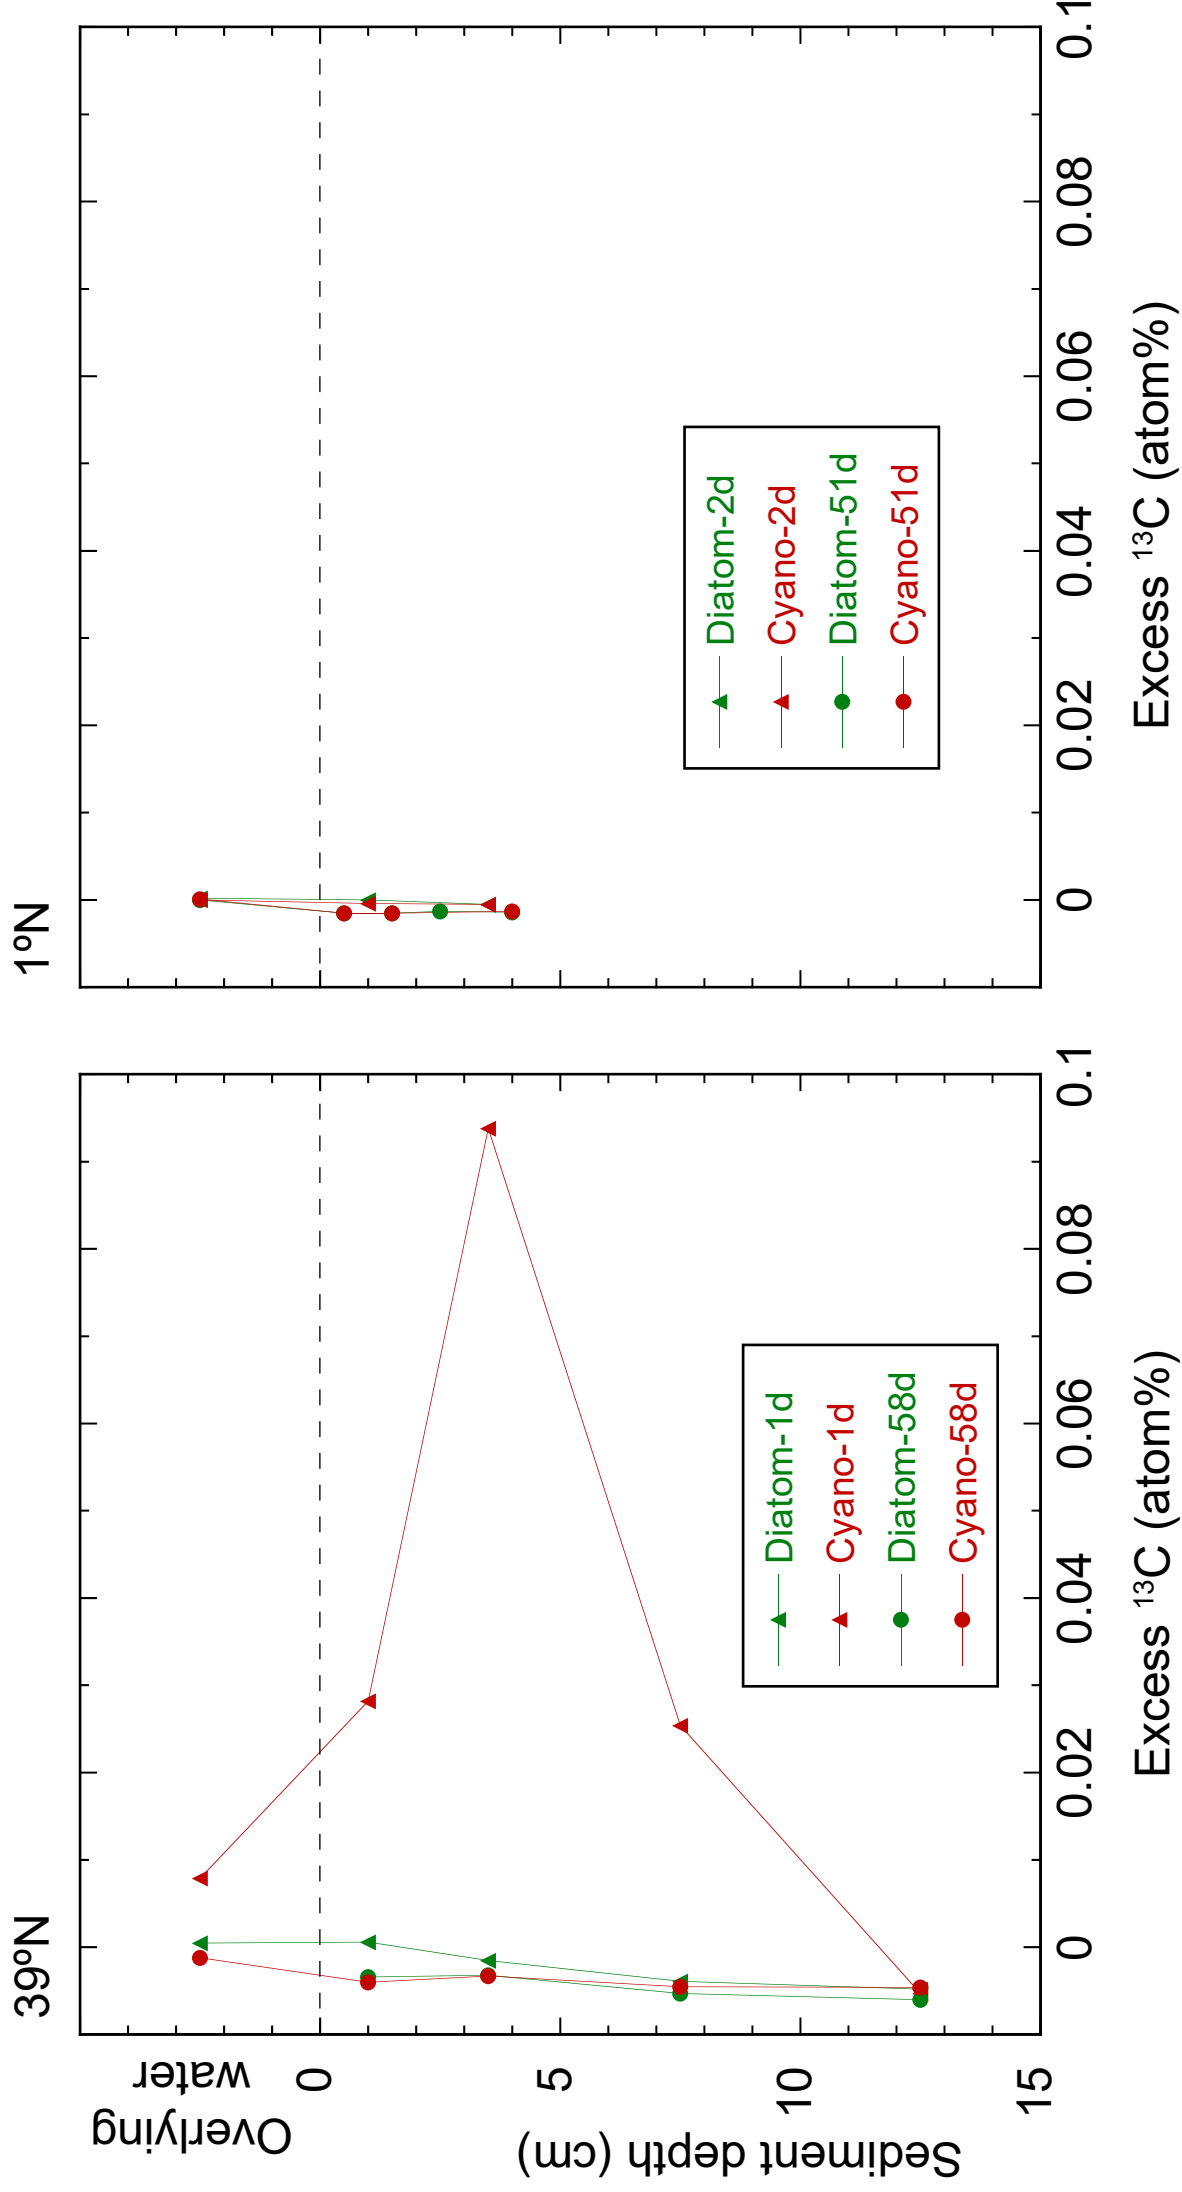

39°N

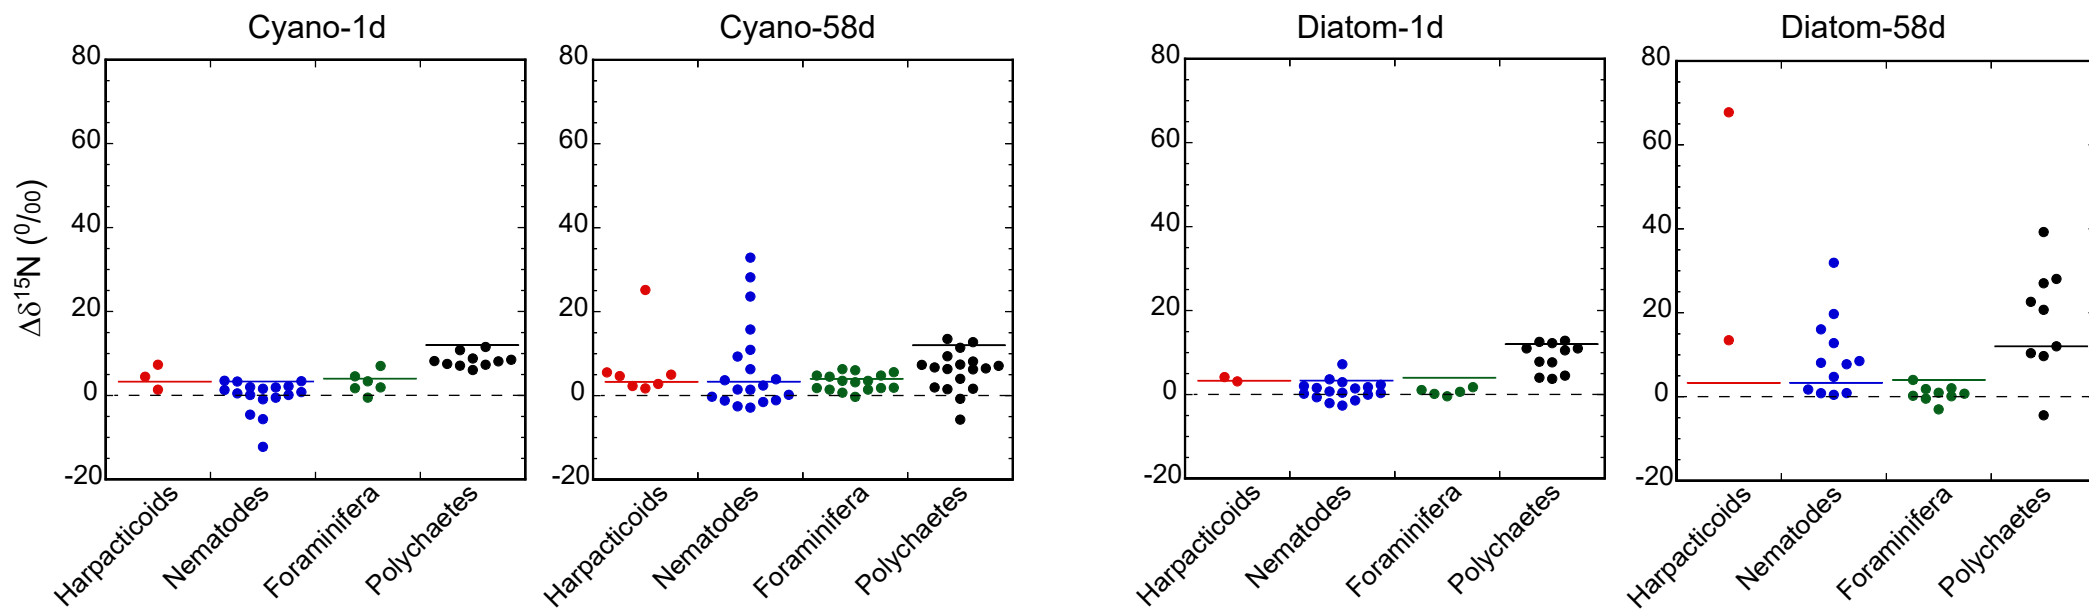

1°N

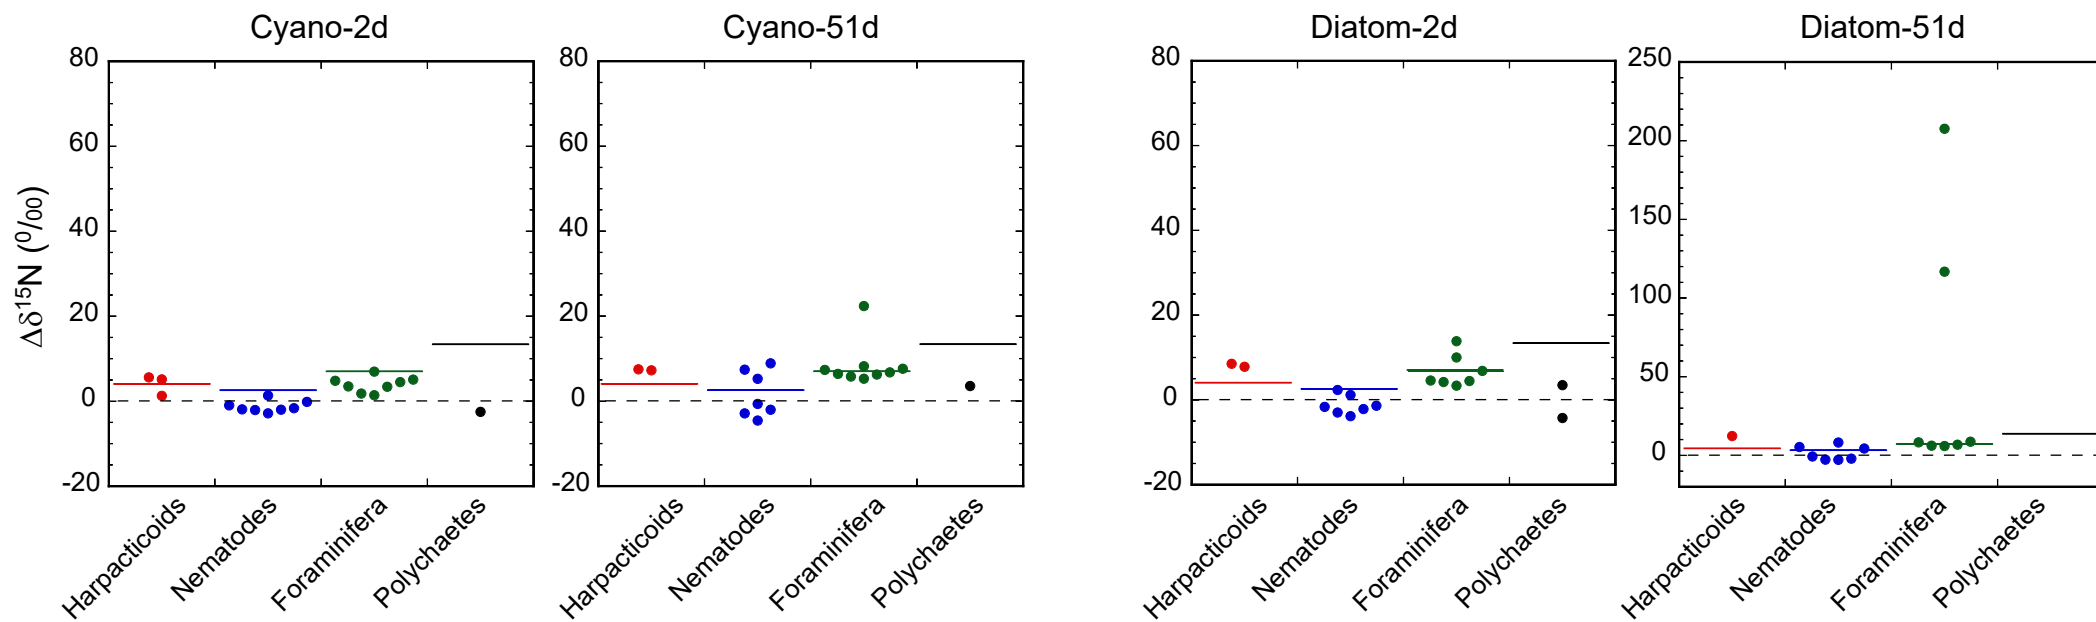

Supplement: GCB-27-6139-s001.pdf [file GCB-27-6139-s001.pdf]
